# Supplementary material for: Whole-transcriptome profiling and identification of cold tolerance-related ceRNA networks in japonica rice varieties
Source: Front Plant Sci. 2024 Mar 19;15:1260591. doi: 10.3389/fpls.2024.1260591 (PMC10985246; doi:10.3389/fpls.2024.1260591)
Supplement: Supplementary file 14 [file Table_11.xlsx]

## Sheet: Sheet1
Table S11 Results of RNAhybrid analysis of circRNA-miRNA
MiRNA	CircRNA	Energy	Pvalue	Position
osa-miR11337-5p	5:14182040|14192085	-44.2	0.00158	9246
osa-miR1423-3p	6:16410145|16410399	-31.3	0.001268	30
osa-miR1423-3p	4:24466451|24467090	-32.5	0.004176	175
osa-miR1423-3p	1:28019655|28020275	-33	0.003005	177
osa-miR1423-3p	1:28019655|28020275	-32.3	0.00443	340
osa-miR1423-3p	5:17019124|17019556	-30.1	0.007737	77
osa-miR1423-3p	5:3783752|3784361	-32.3	0.004355	428
osa-miR1431	2:27493777|27494251	-30.4	0.007766	16
osa-miR1431	7:14918015|14919371	-33.8	0.008052	110
osa-miR1431	1:21414887|21415515	-32.6	0.003844	570
osa-miR156c-3p	10:18940442|18942028	-34.3	0.008767	1499
osa-miR156c-3p	2:5280637|5281014	-33.9	0.000712	4
osa-miR156f-3p	2:5280637|5281014	-31.3	0.00324	4
osa-miR156j-3p	10:12892035|12892702	-31.8	0.007279	486
osa-miR156j-3p	2:5280637|5281014	-36.7	0.000139	4
osa-miR156j-3p	3:35756165|35756545	-31.3	0.003292	26
osa-miR156j-3p	1:14342672|14344473	-39.5	0.000816	653
osa-miR159a.2	10:12892035|12892702	-31.1	0.009822	354
osa-miR159a.2	2:13120196|13120648	-30.2	0.007959	189
osa-miR159a.2	11:28934408|28935042	-31.8	0.006092	133
osa-miR159a.2	3:35756165|35756545	-30.2	0.005699	206
osa-miR160a-5p	10:12892035|12892702	-34.5	0.001514	465
osa-miR160a-5p	10:12892035|12892702	-31.3	0.008801	526
osa-miR160a-5p	2:27493777|27494251	-30.2	0.008702	14
osa-miR160a-5p	9:11180455|11181028	-34.4	0.001177	387
osa-miR160a-5p	11:1269832|1270157	-31.6	0.001855	112
osa-miR160a-5p	12:7452959|7453682	-31.5	0.009114	86
osa-miR160a-5p	3:35756165|35756545	-41.6	7e-06	208
osa-miR160a-5p	5:17019124|17019556	-34.3	0.000687	46
osa-miR160a-5p	5:17019124|17019556	-31.3	0.003854	112
osa-miR160a-5p	5:17019124|17019556	-30.2	0.007304	77
osa-miR160a-5p	5:3783752|3784361	-35.3	0.000808	295
osa-miR160e-5p	10:12892035|12892702	-35.1	0.001088	464
osa-miR160e-5p	7:22354820|22355148	-30.3	0.004003	45
osa-miR160e-5p	9:11180455|11181028	-33.8	0.001647	388
osa-miR160e-5p	11:1269832|1270157	-32.3	0.001223	111
osa-miR160e-5p	3:35756165|35756545	-42.2	5e-06	207
osa-miR160e-5p	1:28019655|28020275	-31.1	0.008611	215
osa-miR160e-5p	5:17019124|17019556	-34.3	0.000687	46
osa-miR160e-5p	5:17019124|17019556	-32	0.002574	111
osa-miR160e-5p	5:17019124|17019556	-30.2	0.007304	77
osa-miR160e-5p	5:3783752|3784361	-35.3	0.000808	295
osa-miR162b	10:12892035|12892702	-32.4	0.004809	45
osa-miR164a	6:14527443|14529515	-35.2	0.008041	885
osa-miR164a	8:3282316|3283320	-32.6	0.008992	927
osa-miR164d	6:14527443|14529515	-35.7	0.006291	884
osa-miR164e	9:11180455|11181028	-30.7	0.009316	241
osa-miR166b-5p	11:2842829|2843702	-32.1	0.009197	380
osa-miR166b-5p	1:8405837|8407137	-34.2	0.006106	139
osa-miR166h-5p	6:31128474|31129402	-33.8	0.004145	199
osa-miR166h-5p	9:11178129|11178622	-33	0.001909	143
osa-miR166h-5p	3:35756165|35756545	-31.1	0.003368	349
osa-miR166h-5p	5:3783752|3784361	-32.8	0.003244	44
osa-miR166k-5p	6:27724876|27725416	-30.7	0.008356	491
osa-miR166k-5p	9:450915|451626	-33.7	0.00266	485
osa-miR168a-3p	11:2842829|2843702	-33	0.007205	447
osa-miR168a-3p	1:21414887|21415515	-32.2	0.006143	560
osa-miR168a-3p	5:17019124|17019556	-31.6	0.004242	2
osa-miR168a-3p	8:3282316|3283320	-33	0.00936	665
osa-miR168a-5p	10:12892035|12892702	-31.1	0.009822	444
osa-miR168a-5p	7:17619729|17620645	-34.1	0.003451	415
osa-miR168a-5p	5:3783752|3784361	-31.2	0.007885	471
osa-miR171d-5p	6:26947004|26948514	-34.3	0.007481	101
osa-miR171d-5p	2:1131176|1131373	-31.2	0.000752	113
osa-miR1846a-3p	6:26947004|26948514	-35.4	0.004286	96
osa-miR1846a-3p	6:31128474|31129402	-32.7	0.007437	679
osa-miR1846a-3p	10:12892035|12892702	-35.4	0.000922	470
osa-miR1846a-3p	10:12892035|12892702	-32.7	0.004077	356
osa-miR1846a-3p	10:12892035|12892702	-32.6	0.004308	529
osa-miR1846a-3p	2:27493777|27494251	-31.6	0.003918	145
osa-miR1846a-3p	2:3231099|3233380	-35.9	0.006673	786
osa-miR1846a-3p	4:21452589|21453150	-30.7	0.008963	426
osa-miR1846a-3p	9:10618503|10619042	-33.5	0.001723	9
osa-miR1846a-3p	9:10618503|10619042	-30.5	0.009317	83
osa-miR1846a-3p	9:11180455|11181028	-32.3	0.003812	387
osa-miR1846a-3p	9:20546530|20548239	-35	0.00647	397
osa-miR1846a-3p	9:450915|451626	-34	0.002258	13
osa-miR1846a-3p	11:1269832|1270157	-30.1	0.004425	3
osa-miR1846a-3p	11:2842829|2843702	-33.3	0.004843	746
osa-miR1846a-3p	11:2842829|2843702	-32.7	0.006675	450
osa-miR1846a-3p	3:35756165|35756545	-36.9	0.000113	92
osa-miR1846a-3p	3:35756165|35756545	-32.9	0.001175	144
osa-miR1846a-3p	3:35756165|35756545	-30.1	0.006042	43
osa-miR1846a-3p	1:41510306|41517984	-39.1	0.009648	4209
osa-miR1846a-3p	5:3783752|3784361	-30.9	0.009311	299
osa-miR1846a-3p	8:25889975|25893080	-40.8	0.001064	1404
osa-miR1846a-3p	8:25889975|25893080	-37.6	0.004853	800
osa-miR1846a-5p	10:12892035|12892702	-37.6	0.000274	135
osa-miR1846a-5p	10:12892035|12892702	-32.4	0.004809	222
osa-miR1846a-5p	2:1131176|1131373	-32.3	0.000375	149
osa-miR1846a-5p	2:27316441|27318784	-36.6	0.00496	2168
osa-miR1846a-5p	2:27493777|27494251	-31.6	0.003918	39
osa-miR1846a-5p	2:3231099|3233380	-39.5	0.001153	272
osa-miR1846a-5p	2:3231099|3233380	-36.4	0.005231	526
osa-miR1846a-5p	2:5280637|5281014	-43.5	2e-06	251
osa-miR1846a-5p	2:5280637|5281014	-33.2	0.000969	293
osa-miR1846a-5p	2:5280637|5281014	-33.1	0.001027	171
osa-miR1846a-5p	2:5280637|5281014	-30.3	0.005292	221
osa-miR1846a-5p	4:24466451|24467090	-34.7	0.001244	119
osa-miR1846a-5p	4:24466451|24467090	-34.1	0.001733	153
osa-miR1846a-5p	7:17619729|17620645	-34.2	0.00322	504
osa-miR1846a-5p	7:17619729|17620645	-33.3	0.005199	237
osa-miR1846a-5p	7:17619729|17620645	-33	0.006197	549
osa-miR1846a-5p	7:17619729|17620645	-32.6	0.00783	282
osa-miR1846a-5p	7:17619729|17620645	-32.2	0.00948	773
osa-miR1846a-5p	7:22354820|22355148	-34.2	0.000393	286
osa-miR1846a-5p	7:22354820|22355148	-30.7	0.003156	218
osa-miR1846a-5p	7:29581983|29583217	-34.9	0.003886	203
osa-miR1846a-5p	9:10618503|10619042	-31.2	0.006288	372
osa-miR1846a-5p	9:450915|451626	-31.4	0.009342	144
osa-miR1846a-5p	11:25597643|25602176	-38.5	0.005784	313
osa-miR1846a-5p	11:2840945|2843702	-35.7	0.009929	348
osa-miR1846a-5p	11:2840945|2843702	-35.7	0.009929	693
osa-miR1846a-5p	11:2842829|2843702	-35.7	0.00134	348
osa-miR1846a-5p	11:2842829|2843702	-35.7	0.00134	693
osa-miR1846a-5p	11:2842829|2843702	-34.7	0.002289	387
osa-miR1846a-5p	11:2842829|2843702	-33.9	0.003513	112
osa-miR1846a-5p	12:7452959|7453682	-35.7	0.000921	172
osa-miR1846a-5p	12:7452959|7453682	-35.6	0.000973	147
osa-miR1846a-5p	12:7691660|7693592	-36.3	0.004164	91
osa-miR1846a-5p	3:35756165|35756545	-33.9	0.000654	3
osa-miR1846a-5p	3:35756165|35756545	-30.5	0.004783	166
osa-miR1846a-5p	1:14342672|14344473	-34.6	0.008613	489
osa-miR1846a-5p	1:14342672|14344473	-34.4	0.009513	1327
osa-miR1846a-5p	1:22958090|22958330	-34.4	0.000165	30
osa-miR1846a-5p	1:25700122|25701007	-33.5	0.004462	399
osa-miR1846a-5p	1:25700122|25701007	-33	0.005827	100
osa-miR1846a-5p	1:2779813|2788690	-40.8	0.005678	8571
osa-miR1846a-5p	1:28018040|28020275	-40.8	0.000589	409
osa-miR1846a-5p	1:28018040|28020275	-36.8	0.004243	368
osa-miR1846a-5p	1:28018040|28020275	-36	0.006149	1916
osa-miR1846a-5p	1:28019655|28020275	-40.8	4e-05	409
osa-miR1846a-5p	1:28019655|28020275	-36.8	0.000373	368
osa-miR1846a-5p	1:28019655|28020275	-32	0.005232	8
osa-miR1846a-5p	1:28019655|28020275	-30.9	0.009618	442
osa-miR1846a-5p	5:14182040|14192085	-40.4	0.008049	7433
osa-miR1846a-5p	5:17019124|17019556	-35.4	0.000364	375
osa-miR1846a-5p	5:17019124|17019556	-32.6	0.001831	270
osa-miR1846a-5p	5:17019124|17019556	-32.3	0.002178	163
osa-miR1846a-5p	5:17019124|17019556	-32.3	0.002178	340
osa-miR1846a-5p	5:17019124|17019556	-32.2	0.002307	92
osa-miR1846a-5p	5:3783752|3784361	-39.3	8.7e-05	175
osa-miR1846a-5p	5:3783752|3784361	-33.3	0.002457	83
osa-miR1846a-5p	5:3783752|3784361	-32.6	0.003625	115
osa-miR1846a-5p	5:3783752|3784361	-31.8	0.005653	1
osa-miR1846a-5p	8:25889975|25893080	-36.2	0.009413	303
osa-miR1846a-5p	8:27737960|27738788	-39.2	0.000183	652
osa-miR1846a-5p	8:27737960|27738788	-32.5	0.006761	284
osa-miR1847.1	9:11178129|11178622	-31.6	0.00423	396
osa-miR1848	6:26947004|26948514	-35.5	0.004074	983
osa-miR1848	6:26947004|26948514	-34.9	0.005522	133
osa-miR1848	6:26947004|26948514	-33.9	0.009158	94
osa-miR1848	6:26947004|26948514	-33.9	0.009158	663
osa-miR1848	6:2698918|2700348	-37.2	0.001557	1156
osa-miR1848	6:28162233|28163152	-38.9	0.000269	37
osa-miR1848	10:12892035|12892702	-39.7	8.6e-05	449
osa-miR1848	10:12892035|12892702	-34.1	0.001887	240
osa-miR1848	10:12892035|12892702	-33.1	0.003272	375
osa-miR1848	10:12892035|12892702	-32.4	0.004809	342
osa-miR1848	10:12892035|12892702	-31.4	0.008331	313
osa-miR1848	10:12892035|12892702	-31.1	0.009822	571
osa-miR1848	2:27316441|27318784	-37.8	0.002768	2102
osa-miR1848	2:27493777|27494251	-37.2	0.00016	132
osa-miR1848	2:27493777|27494251	-36.4	0.000252	45
osa-miR1848	2:27493777|27494251	-32	0.003118	16
osa-miR1848	2:27493777|27494251	-31.4	0.004366	390
osa-miR1848	2:3231099|3233380	-41	0.000555	775
osa-miR1848	2:3231099|3233380	-36.7	0.00452	305
osa-miR1848	2:5280637|5281014	-41.1	9e-06	105
osa-miR1848	2:5280637|5281014	-33.3	0.000914	217
osa-miR1848	2:5280637|5281014	-31.3	0.002948	76
osa-miR1848	2:5280637|5281014	-30.1	0.005949	198
osa-miR1848	4:21452589|21453150	-32.5	0.003327	45
osa-miR1848	4:21452589|21453150	-30.6	0.009478	381
osa-miR1848	4:22184732|22185773	-33	0.007757	898
osa-miR1848	4:24466451|24467090	-32.4	0.004437	116
osa-miR1848	4:32079435|32086299	-41.3	0.003106	1164
osa-miR1848	4:32079435|32086299	-39.1	0.008175	38
osa-miR1848	7:17619729|17620645	-35.8	0.001394	379
osa-miR1848	7:17619729|17620645	-34.3	0.003102	493
osa-miR1848	7:17619729|17620645	-33	0.006197	548
osa-miR1848	7:22354820|22355148	-32.4	0.001148	288
osa-miR1848	7:22354820|22355148	-30.9	0.002752	186
osa-miR1848	7:22354820|22355148	-30.6	0.003349	240
osa-miR1848	9:10618503|10619042	-30.5	0.009317	168
osa-miR1848	9:11180455|11181028	-31.8	0.005041	381
osa-miR1848	9:20546530|20548239	-36	0.003864	113
osa-miR1848	9:20546530|20548239	-35.5	0.005038	412
osa-miR1848	9:450915|451626	-34.9	0.00138	2
osa-miR1848	11:25597643|25602176	-40.9	0.001926	221
osa-miR1848	11:25597643|25602176	-40.8	0.002016	153
osa-miR1848	11:25597643|25602176	-37.9	0.007612	2
osa-miR1848	11:2840945|2843702	-38.1	0.003149	2441
osa-miR1848	11:2840945|2843702	-36.8	0.005868	502
osa-miR1848	11:2840945|2843702	-36.2	0.007819	69
osa-miR1848	11:2842829|2843702	-36.8	0.000743	502
osa-miR1848	11:2842829|2843702	-36.2	0.001025	69
osa-miR1848	11:2842829|2843702	-34.6	0.002415	685
osa-miR1848	11:2842829|2843702	-34.5	0.002548	211
osa-miR1848	11:2842829|2843702	-33.3	0.004843	738
osa-miR1848	11:2842829|2843702	-33.3	0.004843	346
osa-miR1848	11:2842829|2843702	-33.2	0.00511	526
osa-miR1848	11:2842829|2843702	-33	0.005686	560
osa-miR1848	11:2842829|2843702	-32.9	0.005999	109
osa-miR1848	11:2842829|2843702	-32.5	0.007428	788
osa-miR1848	11:28934408|28935042	-34.5	0.001367	211
osa-miR1848	11:28934408|28935042	-32	0.005424	31
osa-miR1848	11:28934408|28935042	-31.5	0.00719	268
osa-miR1848	11:28965231|28974121	-40	0.008041	8063
osa-miR1848	12:7452959|7453682	-36.1	0.000732	79
osa-miR1848	12:7452959|7453682	-35	0.00135	123
osa-miR1848	3:35756165|35756545	-31.9	0.002109	211
osa-miR1848	3:35756165|35756545	-30.4	0.005071	30
osa-miR1848	3:9248500|9251168	-35.8	0.008992	161
osa-miR1848	1:11974551|11980083	-41	0.002536	359
osa-miR1848	1:14342672|14344473	-36.1	0.004082	23
osa-miR1848	1:14342672|14344473	-35	0.007059	745
osa-miR1848	1:21414887|21415515	-33.9	0.001871	560
osa-miR1848	1:22958090|22958330	-31.9	0.000771	172
osa-miR1848	1:25700122|25701007	-39	0.000235	767
osa-miR1848	1:25700122|25701007	-38.2	0.000361	477
osa-miR1848	1:2779813|2788690	-44	0.00142	3654
osa-miR1848	1:2779813|2788690	-40.5	0.006465	8733
osa-miR1848	1:28018040|28020275	-41.1	0.000508	1874
osa-miR1848	1:28018040|28020275	-36.8	0.004161	464
osa-miR1848	1:28019655|28020275	-36.8	0.000364	464
osa-miR1848	1:28019655|28020275	-33.1	0.002843	177
osa-miR1848	1:28019655|28020275	-32.1	0.00495	329
osa-miR1848	1:28019655|28020275	-31.3	0.007709	534
osa-miR1848	1:28019655|28020275	-31.2	0.008147	360
osa-miR1848	5:17019124|17019556	-36.8	0.000162	134
osa-miR1848	5:17019124|17019556	-33.2	0.001288	276
osa-miR1848	5:17019124|17019556	-32.9	0.00154	94
osa-miR1848	5:17019124|17019556	-32.5	0.00194	66
osa-miR1848	5:17019124|17019556	-30.8	0.005171	213
osa-miR1848	5:17019124|17019556	-30.7	0.005477	164
osa-miR1848	5:17019124|17019556	-30.4	0.00651	331
osa-miR1848	5:3783752|3784361	-36	0.000547	198
osa-miR1848	5:3783752|3784361	-35.4	0.000764	369
osa-miR1848	5:3783752|3784361	-34.6	0.001192	462
osa-miR1848	5:3783752|3784361	-34.4	0.001333	286
osa-miR1848	5:3783752|3784361	-32.7	0.003429	310
osa-miR1848	5:3783752|3784361	-31.7	0.005975	168
osa-miR1848	8:25889975|25893080	-40.4	0.001281	397
osa-miR1848	8:25889975|25893080	-36.8	0.007088	247
osa-miR1848	8:25889975|25893080	-36.5	0.008168	638
osa-miR1848	8:27737960|27738788	-36	0.001028	534
osa-miR1848	8:27737960|27738788	-33.8	0.00336	463
osa-miR1850.1	6:28162233|28163152	-32.2	0.009534	301
osa-miR1861h	12:7452959|7453682	-32.2	0.006774	240
osa-miR1865-5p	5:3783752|3784361	-33	0.003747	367
osa-miR1868	2:4694023|4694319	-33	0.00086	96
osa-miR1868	5:17019124|17019556	-31.2	0.005324	273
osa-miR1868	5:17019124|17019556	-31	0.005964	102
osa-miR1868	5:17019124|17019556	-30.1	0.009934	374
osa-miR1873	3:34767417|34768567	-33.3	0.009869	12
osa-miR1876	10:12892035|12892702	-36.2	0.000781	230
osa-miR1876	2:27493777|27494251	-31.6	0.00507	168
osa-miR1876	2:5280637|5281014	-31	0.004584	23
osa-miR1876	2:5280637|5281014	-30.3	0.006861	211
osa-miR1876	4:24466451|24467090	-31.7	0.008322	592
osa-miR1876	9:11178129|11178622	-32.6	0.00312	260
osa-miR1876	9:450915|451626	-33.3	0.004248	218
osa-miR1876	1:21414887|21415515	-31.9	0.007234	147
osa-miR1876	5:17019124|17019556	-30.1	0.009934	193
osa-miR1876	5:3783752|3784361	-32.4	0.005205	59
osa-miR1876	5:3783752|3784361	-31.5	0.008515	115
osa-miR1883a	2:27493777|27494251	-30.9	0.007387	133
osa-miR1883a	7:22354820|22355148	-30.6	0.00439	279
osa-miR1883a	7:22354820|22355148	-30.1	0.005883	161
osa-miR1883a	12:7452959|7453682	-32.9	0.005433	22
osa-miR1883a	1:29565030|29565783	-32	0.009461	494
osa-miR1883a	5:3783752|3784361	-32.2	0.005807	193
osa-miR2103	6:5027708|5029999	-37.1	0.004049	478
osa-miR2103	10:12892035|12892702	-36.7	0.000497	483
osa-miR2103	2:27493777|27494251	-34.5	0.000826	64
osa-miR2103	2:5280637|5281014	-30.1	0.006514	3
osa-miR2103	11:2840945|2843702	-36.3	0.008021	2544
osa-miR2103	3:35756165|35756545	-30.6	0.004947	136
osa-miR2103	1:14342672|14344473	-36.4	0.003807	583
osa-miR2103	5:17019124|17019556	-33.3	0.001348	5
osa-miR2103	5:17019124|17019556	-31.6	0.003577	59
osa-miR2118b	10:12892035|12892702	-31.6	0.00812	474
osa-miR2118b	4:21452589|21453150	-37.5	0.00022	421
osa-miR2118o	4:21452589|21453150	-32.5	0.00358	422
osa-miR2118o	7:22232444|22233034	-35.8	0.000631	497
osa-miR2118o	7:22232444|22233538	-35.8	0.002131	1001
osa-miR2118o	5:17019124|17019556	-30.3	0.007709	51
osa-miR2867-3p	6:26947004|26948514	-34.9	0.005079	324
osa-miR2867-3p	4:21452589|21453150	-33	0.002244	363
osa-miR2867-3p	1:21414887|21415515	-32.8	0.003133	397
osa-miR2867-3p	1:28019655|28020275	-30.7	0.009838	369
osa-miR2867-3p	5:17019124|17019556	-31.8	0.002632	321
osa-miR2867-3p	5:3783752|3784361	-35.7	0.00058	123
osa-miR2877	10:12892035|12892702	-31.9	0.008061	362
osa-miR2877	10:13825451|13826469	-33.8	0.006197	688
osa-miR2877	2:1131176|1131373	-34.7	0.000116	3
osa-miR2877	9:10618503|10619042	-31.7	0.006104	80
osa-miR2877	3:34768873|34770741	-36.4	0.004781	1770
osa-miR2880	1:14342672|14344473	-38.4	0.001647	71
osa-miR2880	5:17019124|17019556	-32.3	0.00285	105
osa-miR390-5p	5:17019124|17019556	-33	0.001454	282
osa-miR395a	1:22958090|22958330	-30.8	0.00152	58
osa-miR397a	7:22354820|22355148	-30.9	0.002802	235
osa-miR397b	7:22354820|22355148	-30.8	0.002974	235
osa-miR3980a-3p	10:12892035|12892702	-33.5	0.002625	256
osa-miR3980a-3p	10:12892035|12892702	-32.7	0.004077	328
osa-miR3980a-3p	2:27316441|27318784	-35.2	0.009787	544
osa-miR3980a-3p	2:27493777|27494251	-30.2	0.008702	114
osa-miR3980a-3p	2:5280637|5281014	-31.6	0.002473	176
osa-miR3980a-3p	4:24466451|24467090	-31.8	0.006181	122
osa-miR3980a-3p	9:11178129|11178622	-32.8	0.002138	138
osa-miR3980a-3p	9:450915|451626	-33.2	0.003497	3
osa-miR3980a-3p	11:28934408|28935042	-31.5	0.00719	337
osa-miR3980a-3p	1:28019655|28020275	-32.4	0.004191	383
osa-miR3980a-3p	5:3783752|3784361	-33	0.002903	281
osa-miR3980a-3p	5:3783752|3784361	-31.6	0.006281	178
osa-miR3980a-5p	7:17619729|17620645	-32.1	0.009839	703
osa-miR398a	7:17619729|17620645	-33.9	0.003838	594
osa-miR398b	6:27724876|27725416	-30.8	0.0079	9
osa-miR398b	4:21452589|21453150	-31.2	0.006777	507
osa-miR398b	7:17619729|17620645	-36.7	0.000863	598
osa-miR399d	5:21758411|21759629	-34.4	0.004919	51
osa-miR399j	5:21758411|21759629	-34.4	0.004919	51
osa-miR408-3p	10:12892035|12892702	-31.9	0.00633	471
osa-miR408-3p	10:12892035|12892702	-31.5	0.007886	510
osa-miR408-3p	10:12892035|12892702	-31.1	0.009822	358
osa-miR408-3p	11:2842829|2843702	-32	0.009649	538
osa-miR408-3p	12:7452959|7453682	-33.5	0.003064	65
osa-miR408-3p	3:35756165|35756545	-32.1	0.001876	145
osa-miR408-3p	3:35756165|35756545	-31.5	0.002665	214
osa-miR408-3p	5:3783752|3784361	-32.6	0.003625	302
osa-miR408-3p	8:18355126|18357344	-35.5	0.00775	1849
osa-miR408-3p	8:25889975|25893080	-37.6	0.004853	704
osa-miR408-5p	7:22354820|22355148	-30.5	0.003554	268
osa-miR408-5p	9:450915|451626	-31.3	0.009865	240
osa-miR444a-3p.1	10:12892035|12892702	-32.3	0.005081	472
osa-miR444a-3p.1	10:12892035|12892702	-31.3	0.008801	355
osa-miR444a-3p.1	4:24466451|24467090	-31.3	0.008144	113
osa-miR444a-3p.1	11:1269832|1270157	-34.8	0.000269	138
osa-miR444b.1	2:13120196|13120648	-31.2	0.004488	188
osa-miR444b.1	11:1269832|1270157	-30.2	0.004169	138
osa-miR5072	10:12892035|12892702	-37.9	0.000257	374
osa-miR5072	10:12892035|12892702	-32.6	0.004699	459
osa-miR5072	2:13120196|13120648	-32.3	0.002622	187
osa-miR5072	2:27493777|27494251	-30.7	0.007147	12
osa-miR5072	7:29507568|29508131	-32.7	0.003224	501
osa-miR5072	11:2840945|2843702	-36.7	0.00663	2539
osa-miR5072	12:7452959|7453682	-33.1	0.004134	16
osa-miR5072	3:9248500|9251168	-37.4	0.004503	585
osa-miR5072	1:28019655|28020275	-33	0.003286	336
osa-miR5072	5:17019124|17019556	-33.4	0.001273	70
osa-miR5072	5:17019124|17019556	-30.3	0.007534	101
osa-miR5077	6:26947004|26948514	-38.2	0.000857	157
osa-miR5077	3:35756165|35756545	-32.7	0.00109	70
osa-miR5082	6:26947004|26948514	-38.3	0.001261	1332
osa-miR5082	6:26947004|26948514	-35.7	0.004634	160
osa-miR5082	6:31128474|31129402	-32.9	0.008442	388
osa-miR5082	10:12892035|12892702	-37.3	0.00043	313
osa-miR5082	10:12892035|12892702	-34.9	0.001583	237
osa-miR5082	10:12892035|12892702	-34.4	0.002077	405
osa-miR5082	10:12892035|12892702	-33.8	0.002877	579
osa-miR5082	2:4694023|4694319	-36.3	0.000121	5
osa-miR5082	2:5280637|5281014	-30.5	0.006115	227
osa-miR5082	4:21452589|21453150	-34.5	0.001399	287
osa-miR5082	4:21452589|21453150	-32	0.005569	390
osa-miR5082	4:21452589|21453150	-31.1	0.009149	103
osa-miR5082	4:24466451|24467090	-32.8	0.004548	592
osa-miR5082	7:22354820|22355148	-33.4	0.000851	104
osa-miR5082	7:22354820|22355148	-30.8	0.003837	182
osa-miR5082	7:29581983|29583217	-36.8	0.001862	195
osa-miR5082	9:20546530|20548239	-37.7	0.002122	107
osa-miR5082	9:450915|451626	-32.1	0.008107	276
osa-miR5082	11:25597643|25602176	-38.5	0.007085	3660
osa-miR5082	11:2840945|2843702	-38.5	0.003246	376
osa-miR5082	11:2842829|2843702	-38.5	0.000394	376
osa-miR5082	11:2842829|2843702	-33.7	0.004981	276
osa-miR5082	11:2842829|2843702	-32.6	0.008895	504
osa-miR5082	11:2842829|2843702	-32.4	0.009883	217
osa-miR5082	11:28934408|28935042	-33.8	0.002612	169
osa-miR5082	12:7452959|7453682	-31.9	0.009297	204
osa-miR5082	3:35756165|35756545	-31.5	0.003471	198
osa-miR5082	1:14342672|14344473	-35.8	0.005895	835
osa-miR5082	1:28019655|28020275	-35.4	0.001042	228
osa-miR5082	1:28019655|28020275	-34	0.002243	459
osa-miR5082	1:28019655|28020275	-32.3	0.005682	191
osa-miR5082	1:28019655|28020275	-31.5	0.008792	587
osa-miR5082	1:28019655|28020275	-31.4	0.009285	96
osa-miR5082	5:17019124|17019556	-37.7	0.000132	208
osa-miR5082	5:17019124|17019556	-33.7	0.001286	333
osa-miR5082	5:17019124|17019556	-33.3	0.001614	234
osa-miR5082	5:17019124|17019556	-32	0.00336	123
osa-miR5082	5:17019124|17019556	-30.6	0.007483	51
osa-miR5082	5:17019124|17019556	-30.2	0.009387	273
osa-miR5082	5:3783752|3784361	-34.9	0.001322	281
osa-miR5082	5:3783752|3784361	-34.8	0.001397	186
osa-miR5082	8:25889975|25893080	-37.5	0.006286	1172
osa-miR5082	8:27737960|27738788	-32.5	0.008556	644
osa-miR5149	1:28018040|28020275	-35.2	0.009777	152
osa-miR5149	1:28019655|28020275	-35.2	0.000975	152
osa-miR5149	1:36327923|36328628	-31.6	0.008966	242
osa-miR5149	5:17019124|17019556	-30.6	0.006345	288
osa-miR5150-5p	1:8405837|8407137	-34.8	0.005622	50
osa-miR528-3p	11:1269832|1270157	-32.8	0.000886	100
osa-miR528-3p	12:7452959|7453682	-31.6	0.008632	108
osa-miR528-5p	9:10618503|10619042	-31.6	0.005022	164
osa-miR528-5p	9:450915|451626	-32.8	0.004351	243
osa-miR528-5p	3:15501388|15506961	-40.6	0.003072	1230
osa-miR528-5p	8:3282316|3283320	-32.6	0.008992	923
osa-miR529b	2:27316441|27318784	-35.3	0.009324	1706
osa-miR531a	6:1557339|1558465	-34	0.006616	738
osa-miR531a	6:16410145|16432329	-43	0.00963	4642
osa-miR531a	6:26947004|26948514	-40.7	0.000379	97
osa-miR531a	6:26947004|26948514	-37.1	0.0023	213
osa-miR531a	6:26947004|26948514	-34.7	0.007639	150
osa-miR531a	6:2698918|2700348	-34.2	0.008971	1159
osa-miR531a	6:28162233|28163152	-32.8	0.008748	28
osa-miR531a	6:31128474|31129402	-32.9	0.008442	489
osa-miR531a	10:12892035|12892702	-41.8	3.7e-05	525
osa-miR531a	10:12892035|12892702	-40.4	8e-05	459
osa-miR531a	10:12892035|12892702	-40.1	9.4e-05	374
osa-miR531a	10:12892035|12892702	-39.8	0.00011	329
osa-miR531a	10:12892035|12892702	-36.3	0.00074	13
osa-miR531a	10:12892035|12892702	-33.9	0.002725	485
osa-miR531a	10:12892035|12892702	-33.8	0.002877	264
osa-miR531a	10:13825451|13826469	-34.7	0.003882	920
osa-miR531a	10:18940442|18942028	-38.5	0.001248	1402
osa-miR531a	10:18940442|18942028	-38.4	0.001311	1494
osa-miR531a	10:18940442|18942028	-36.3	0.003735	1017
osa-miR531a	10:18940442|18942028	-35.6	0.005293	1458
osa-miR531a	2:13120196|13120648	-32	0.003693	187
osa-miR531a	2:20007515|20009401	-35	0.009636	88
osa-miR531a	2:25949835|25950654	-33.5	0.004938	486
osa-miR531a	2:2621269|2624309	-37	0.007686	248
osa-miR531a	2:27316441|27318784	-40.2	0.001093	550
osa-miR531a	2:27316441|27318784	-36.5	0.006373	379
osa-miR531a	2:27316441|27318784	-35.6	0.009953	524
osa-miR531a	2:27493777|27494251	-39.4	6.3e-05	13
osa-miR531a	2:27493777|27494251	-36.8	0.000271	114
osa-miR531a	2:27493777|27494251	-35	0.000748	47
osa-miR531a	2:27493777|27494251	-34.7	0.000885	425
osa-miR531a	2:27493777|27494251	-32	0.004049	92
osa-miR531a	2:3231099|3233380	-39.4	0.001532	319
osa-miR531a	2:3231099|3233380	-39.3	0.001608	2110
osa-miR531a	2:3231099|3233380	-38.6	0.002243	754
osa-miR531a	2:4694023|4694319	-33.3	0.00072	16
osa-miR531a	2:4694023|4694319	-30.8	0.003169	140
osa-miR531a	2:5280637|5281014	-39	4.5e-05	102
osa-miR531a	2:5280637|5281014	-38.6	5.7e-05	251
osa-miR531a	2:5280637|5281014	-38.1	7.6e-05	211
osa-miR531a	2:5280637|5281014	-35.2	0.000406	24
osa-miR531a	2:5280637|5281014	-30.6	0.005772	293
osa-miR531a	2:5280637|5281014	-30.5	0.00601	138
osa-miR531a	2:7085140|7086354	-36.4	0.002218	1001
osa-miR531a	4:19391425|19401494	-41.8	0.00538	4898
osa-miR531a	4:21452589|21453150	-39	0.000115	291
osa-miR531a	4:21452589|21453150	-34.3	0.001562	378
osa-miR531a	4:21452589|21453150	-32.5	0.004202	42
osa-miR531a	4:21452589|21453150	-32.4	0.004465	1
osa-miR531a	4:21452589|21453150	-31.7	0.006572	444
osa-miR531a	4:22184732|22185773	-35.8	0.002282	804
osa-miR531a	4:22184732|22185773	-34.2	0.005235	274
osa-miR531a	4:24466451|24467090	-37.9	0.000283	113
osa-miR531a	4:32079435|32086299	-42.8	0.001974	4971
osa-miR531a	4:32079435|32086299	-40	0.006716	4265
osa-miR531a	7:17619729|17620645	-37	0.000977	478
osa-miR531a	7:17619729|17620645	-36.9	0.001009	276
osa-miR531a	7:17619729|17620645	-35.1	0.0026	327
osa-miR531a	7:17619729|17620645	-34.1	0.004398	237
osa-miR531a	7:17619729|17620645	-34.1	0.004491	126
osa-miR531a	7:17619729|17620645	-34	0.004635	548
osa-miR531a	7:17619729|17620645	-33.5	0.006026	377
osa-miR531a	7:22354820|22355148	-34.9	0.000353	191
osa-miR531a	7:22354820|22355148	-31.4	0.002748	239
osa-miR531a	7:22354820|22355148	-30.1	0.005883	286
osa-miR531a	7:29581983|29583217	-37.3	0.001442	1048
osa-miR531a	9:10618503|10619042	-32	0.005169	72
osa-miR531a	9:11178129|11178622	-34	0.001423	304
osa-miR531a	9:11178129|11178622	-31.4	0.006108	104
osa-miR531a	9:11180455|11181028	-34.3	0.001629	376
osa-miR531a	9:11180455|11181028	-31.8	0.006466	194
osa-miR531a	9:11180455|11181028	-31.7	0.006832	243
osa-miR531a	9:1805079|1809962	-40.8	0.002813	2635
osa-miR531a	9:1806424|1809962	-40.8	0.00167	1290
osa-miR531a	9:20546530|20548239	-36.1	0.004683	406
osa-miR531a	9:20546530|20548239	-36.1	0.004683	188
osa-miR531a	9:450915|451626	-41.1	6.3e-05	11
osa-miR531a	9:450915|451626	-39.9	0.00012	35
osa-miR531a	9:450915|451626	-35	0.001698	218
osa-miR531a	11:25597643|25602176	-48.1	9.1e-05	149
osa-miR531a	11:25597643|25602176	-38.8	0.006186	68
osa-miR531a	11:25597643|25602176	-38.8	0.006299	3507
osa-miR531a	11:25597643|25602176	-37.8	0.009722	3563
osa-miR531a	11:2840945|2843702	-47	5.8e-05	520
osa-miR531a	11:2840945|2843702	-43.9	0.000251	693
osa-miR531a	11:2840945|2843702	-43.2	0.00035	784
osa-miR531a	11:2840945|2843702	-42.9	0.000403	2579
osa-miR531a	11:2840945|2843702	-41.6	0.000747	94
osa-miR531a	11:2840945|2843702	-41.2	0.000903	2438
osa-miR531a	11:2840945|2843702	-41.2	0.000903	375
osa-miR531a	11:2840945|2843702	-38.5	0.003246	751
osa-miR531a	11:2840945|2843702	-37.8	0.00452	624
osa-miR531a	11:2840945|2843702	-37.7	0.004739	2539
osa-miR531a	11:2842829|2843702	-47	4e-06	520
osa-miR531a	11:2842829|2843702	-43.9	2.3e-05	693
osa-miR531a	11:2842829|2843702	-43.2	3.3e-05	784
osa-miR531a	11:2842829|2843702	-41.6	7.6e-05	94
osa-miR531a	11:2842829|2843702	-41.2	9.4e-05	375
osa-miR531a	11:2842829|2843702	-38.5	0.000394	751
osa-miR531a	11:2842829|2843702	-37.8	0.000571	624
osa-miR531a	11:2842829|2843702	-37	0.000867	315
osa-miR531a	11:2842829|2843702	-36.7	0.001021	564
osa-miR531a	11:2842829|2843702	-35.8	0.001643	501
osa-miR531a	11:28934408|28935042	-33.3	0.003431	51
osa-miR531a	11:28934408|28935042	-33.1	0.003806	541
osa-miR531a	11:28934408|28935042	-32.6	0.004999	440
osa-miR531a	11:28934408|28935042	-31.4	0.009661	282
osa-miR531a	11:28965231|28974121	-40.2	0.008909	8090
osa-miR531a	12:26348105|26350545	-36.2	0.00796	2286
osa-miR531a	12:7452959|7453682	-39.2	0.000179	85
osa-miR531a	12:7452959|7453682	-39.1	0.000192	131
osa-miR531a	3:35756165|35756545	-40.6	1.8e-05	155
osa-miR531a	3:35756165|35756545	-39.7	3.1e-05	30
osa-miR531a	3:35756165|35756545	-37.5	0.000109	66
osa-miR531a	3:35756165|35756545	-33	0.00147	3
osa-miR531a	3:35756165|35756545	-32.9	0.001594	226
osa-miR531a	3:9248500|9251168	-36.2	0.009109	220
osa-miR531a	1:11974551|11980083	-45.1	0.000502	252
osa-miR531a	1:11974551|11980083	-39.3	0.006661	318
osa-miR531a	1:12871778|12872986	-34.8	0.004981	124
osa-miR531a	1:14342672|14344473	-35.6	0.006536	786
osa-miR531a	1:14342672|14344473	-35.1	0.008356	18
osa-miR531a	1:21414887|21415515	-35.9	0.000814	374
osa-miR531a	1:21414887|21415515	-33.4	0.003191	256
osa-miR531a	1:21414887|21415515	-32.8	0.004428	548
osa-miR531a	1:22121500|22124458	-37.7	0.005303	2540
osa-miR531a	1:22958090|22958330	-32.1	0.000925	30
osa-miR531a	1:22958090|22958330	-31.7	0.001179	78
osa-miR531a	1:25700122|25701007	-34.1	0.004134	187
osa-miR531a	1:25700122|25701007	-32.9	0.007736	487
osa-miR531a	1:25700122|25701007	-32.8	0.008197	610
osa-miR531a	1:26234815|26250049	-42.7	0.006593	13211
osa-miR531a	1:26234815|26250049	-41.7	0.009926	9907
osa-miR531a	1:2779813|2788690	-48.8	0.000223	3693
osa-miR531a	1:2779813|2788690	-42.7	0.003051	3480
osa-miR531a	1:2779813|2788690	-41.7	0.004682	3654
osa-miR531a	1:2779813|2788690	-41.7	0.004762	3747
osa-miR531a	1:2779813|2788690	-40.9	0.006592	3818
osa-miR531a	1:2779813|2788690	-40.8	0.006851	8394
osa-miR531a	1:2779813|2788690	-40.8	0.006851	8679
osa-miR531a	1:2779813|2788690	-40.4	0.008163	1332
osa-miR531a	1:28018040|28020275	-49.9	9e-06	1873
osa-miR531a	1:28018040|28020275	-40.2	0.001005	354
osa-miR531a	1:28018040|28020275	-37.5	0.003647	104
osa-miR531a	1:28018040|28020275	-35.7	0.00881	464
osa-miR531a	1:28018040|28020275	-35.6	0.009244	1906
osa-miR531a	1:28019655|28020275	-40.2	7.5e-05	354
osa-miR531a	1:28019655|28020275	-37.5	0.000325	104
osa-miR531a	1:28019655|28020275	-35.7	0.000884	464
osa-miR531a	1:28019655|28020275	-34.1	0.002123	321
osa-miR531a	1:28019655|28020275	-34	0.002243	216
osa-miR531a	1:28019655|28020275	-32.6	0.004796	43
osa-miR531a	1:28019655|28020275	-31.9	0.006992	409
osa-miR531a	1:35389026|35390484	-36.5	0.002921	1016
osa-miR531a	5:17019124|17019556	-42.5	9e-06	153
osa-miR531a	5:17019124|17019556	-39.5	4.7e-05	77
osa-miR531a	5:17019124|17019556	-39.2	5.7e-05	373
osa-miR531a	5:17019124|17019556	-38.7	7.5e-05	330
osa-miR531a	5:17019124|17019556	-36.3	0.000293	115
osa-miR531a	5:17019124|17019556	-35.4	0.000489	271
osa-miR531a	5:17019124|17019556	-33.2	0.001708	46
osa-miR531a	5:17019124|17019556	-32.6	0.002403	191
osa-miR531a	5:19771563|19772662	-34	0.006378	556
osa-miR531a	5:20549646|20551767	-35.4	0.009374	1945
osa-miR531a	5:21758411|21759629	-34.4	0.006197	394
osa-miR531a	5:3783752|3784361	-38.9	0.000147	392
osa-miR531a	5:3783752|3784361	-37.4	0.000335	292
osa-miR531a	5:3783752|3784361	-35.6	0.000886	458
osa-miR531a	5:3783752|3784361	-35.5	0.000952	176
osa-miR531a	5:3783752|3784361	-35.4	0.000989	63
osa-miR531a	5:3783752|3784361	-32.3	0.005497	230
osa-miR531a	8:25889975|25893080	-45.1	0.000178	396
osa-miR531a	8:25889975|25893080	-42.4	0.000633	581
osa-miR531a	8:25889975|25893080	-42.1	0.000728	1293
osa-miR531a	8:25889975|25893080	-41.4	0.001011	819
osa-miR531a	8:25889975|25893080	-40.6	0.001472	1454
osa-miR531a	8:25889975|25893080	-39.7	0.002244	1379
osa-miR531a	8:25889975|25893080	-39.1	0.002972	1481
osa-miR531a	8:25889975|25893080	-38.1	0.004747	717
osa-miR531a	8:25889975|25893080	-38.1	0.004747	972
osa-miR531a	8:25889975|25893080	-37.9	0.005312	1019
osa-miR531a	8:27737960|27738788	-39.1	0.000257	446
osa-miR531a	8:27737960|27738788	-37.8	0.000513	523
osa-miR531a	8:27737960|27738788	-37.3	0.000658	197
osa-miR531a	8:27737960|27738788	-34.3	0.003294	600
osa-miR531a	8:27737960|27738788	-33.6	0.004776	648
osa-miR531a	8:4394268|4409079	-41.8	0.009139	3538
osa-miR531a	8:5954285|6001870	-46.1	0.007654	23072
osa-miR531a	8:5954285|6001870	-45.8	0.008567	36055
osa-miR531a	8:5954285|6001870	-45.7	0.008895	36185
osa-miR531b	10:12892035|12892702	-35	0.001041	458
osa-miR531b	10:12892035|12892702	-33.3	0.002667	374
osa-miR531b	10:12892035|12892702	-32.5	0.004152	17
osa-miR531b	10:12892035|12892702	-31.4	0.007625	309
osa-miR531b	10:12892035|12892702	-31.4	0.007625	529
osa-miR531b	2:13120196|13120648	-30.6	0.005763	188
osa-miR531b	2:27493777|27494251	-34.5	0.000673	20
osa-miR531b	2:27493777|27494251	-33.5	0.001196	131
osa-miR531b	2:3231099|3233380	-37.4	0.002957	2113
osa-miR531b	2:3231099|3233380	-35.3	0.008264	776
osa-miR531b	2:3231099|3233380	-35	0.009568	347
osa-miR531b	2:5280637|5281014	-34.3	0.000455	210
osa-miR531b	2:5280637|5281014	-34	0.000544	120
osa-miR531b	2:5280637|5281014	-30.9	0.003375	27
osa-miR531b	2:5280637|5281014	-30.5	0.004271	246
osa-miR531b	4:21452589|21453150	-33.9	0.001351	305
osa-miR531b	4:21452589|21453150	-30.4	0.009697	266
osa-miR531b	4:24466451|24467090	-34.1	0.001573	116
osa-miR531b	7:17619729|17620645	-34	0.003326	548
osa-miR531b	7:17619729|17620645	-32.9	0.005991	277
osa-miR531b	7:17619729|17620645	-32.6	0.007033	146
osa-miR531b	7:17619729|17620645	-32.4	0.007826	499
osa-miR531b	7:22354820|22355148	-30.7	0.002852	195
osa-miR531b	9:11178129|11178622	-31.3	0.004564	111
osa-miR531b	9:11180455|11181028	-31.1	0.006807	376
osa-miR531b	9:450915|451626	-32.8	0.003971	2
osa-miR531b	9:450915|451626	-32.1	0.005832	31
osa-miR531b	11:25597643|25602176	-39.6	0.003234	151
osa-miR531b	11:2840945|2843702	-38.1	0.002902	383
osa-miR531b	11:2840945|2843702	-36.7	0.005691	2578
osa-miR531b	11:2840945|2843702	-36.6	0.005971	524
osa-miR531b	11:2842829|2843702	-38.1	0.000334	383
osa-miR531b	11:2842829|2843702	-36.6	0.00075	524
osa-miR531b	11:2842829|2843702	-35.4	0.001431	695
osa-miR531b	11:2842829|2843702	-34.7	0.002086	786
osa-miR531b	11:2842829|2843702	-32.4	0.007187	501
osa-miR531b	11:2842829|2843702	-31.8	0.009916	314
osa-miR531b	12:7452959|7453682	-35.2	0.001098	147
osa-miR531b	12:7452959|7453682	-34.4	0.001675	91
osa-miR531b	3:35756165|35756545	-36.2	0.000151	22
osa-miR531b	3:35756165|35756545	-33.2	0.000881	69
osa-miR531b	3:35756165|35756545	-32.4	0.001419	157
osa-miR531b	1:11974551|11980083	-38.5	0.007267	252
osa-miR531b	1:12871778|12872986	-34	0.005477	140
osa-miR531b	1:21414887|21415515	-33.4	0.002243	256
osa-miR531b	1:2779813|2788690	-39.7	0.008523	3820
osa-miR531b	1:28018040|28020275	-41.4	0.0004	1875
osa-miR531b	1:28019655|28020275	-33.7	0.00185	321
osa-miR531b	1:28019655|28020275	-33.7	0.001892	453
osa-miR531b	1:28019655|28020275	-32.7	0.003231	359
osa-miR531b	1:28019655|28020275	-32	0.004773	192
osa-miR531b	5:17019124|17019556	-35.7	0.000274	100
osa-miR531b	5:17019124|17019556	-34	0.000734	155
osa-miR531b	5:17019124|17019556	-32.3	0.00197	338
osa-miR531b	5:17019124|17019556	-31.2	0.003727	272
osa-miR531b	5:3783752|3784361	-34.6	0.001079	393
osa-miR531b	5:3783752|3784361	-33.9	0.001596	300
osa-miR531b	5:3783752|3784361	-32.7	0.003069	464
osa-miR531b	5:3783752|3784361	-31.6	0.005767	185
osa-miR531b	5:3783752|3784361	-30.8	0.008859	66
osa-miR531b	8:25889975|25893080	-43.3	0.000297	395
osa-miR531b	8:25889975|25893080	-37.6	0.004486	819
osa-miR531b	8:25889975|25893080	-37.1	0.00569	585
osa-miR531b	8:25889975|25893080	-36.6	0.007217	245
osa-miR531b	8:25889975|25893080	-36	0.009596	1454
osa-miR531b	8:27737960|27738788	-34.6	0.001989	524
osa-miR531b	8:27737960|27738788	-33.2	0.004243	648
osa-miR531b	8:27737960|27738788	-31.6	0.009851	198
osa-miR535-3p	10:12892035|12892702	-31.2	0.009297	485
osa-miR535-3p	5:17019124|17019556	-30.3	0.006896	69
osa-miR5493	6:26947004|26948514	-35.2	0.004743	96
osa-miR5493	6:2698918|2700348	-36.1	0.002729	1216
osa-miR5493	10:12892035|12892702	-34.4	0.001599	243
osa-miR5493	10:12892035|12892702	-32.7	0.004011	528
osa-miR5493	10:12892035|12892702	-32.6	0.004308	353
osa-miR5493	10:12892035|12892702	-31.9	0.00633	436
osa-miR5493	10:12892035|12892702	-31.2	0.009297	27
osa-miR5493	10:18940442|18942028	-34.6	0.006981	1408
osa-miR5493	2:27493777|27494251	-36.2	0.000283	390
osa-miR5493	2:27493777|27494251	-33.4	0.001402	154
osa-miR5493	2:27493777|27494251	-31.9	0.003301	22
osa-miR5493	2:3231099|3233380	-37.5	0.00306	719
osa-miR5493	2:5280637|5281014	-31.1	0.003314	81
osa-miR5493	2:5280637|5281014	-30.7	0.004188	238
osa-miR5493	4:19391425|19401494	-41.4	0.005265	4896
osa-miR5493	4:21452589|21453150	-33.1	0.002337	377
osa-miR5493	4:21452589|21453150	-31.9	0.004579	506
osa-miR5493	9:10618503|10619042	-31.3	0.005944	170
osa-miR5493	9:11178129|11181028	-35.9	0.009758	389
osa-miR5493	9:11180455|11181028	-35.9	0.000508	389
osa-miR5493	9:11180455|11181028	-32.5	0.003409	209
osa-miR5493	9:450915|451626	-31.9	0.007112	2
osa-miR5493	11:25597643|25602176	-37.7	0.008341	153
osa-miR5493	11:2840945|2843702	-39.3	0.001771	690
osa-miR5493	11:2842829|2843702	-39.3	0.000195	690
osa-miR5493	11:2842829|2843702	-33.4	0.004591	207
osa-miR5493	11:2842829|2843702	-33	0.005596	505
osa-miR5493	11:2842829|2843702	-33	0.005656	116
osa-miR5493	11:2842829|2843702	-32.8	0.006328	788
osa-miR5493	11:28934408|28935042	-33.3	0.002657	267
osa-miR5493	12:7452959|7453682	-35.2	0.001191	124
osa-miR5493	12:7452959|7453682	-34.7	0.001591	88
osa-miR5493	3:35756165|35756545	-32.2	0.00177	20
osa-miR5493	3:35756165|35756545	-31.1	0.003368	92
osa-miR5493	3:35756165|35756545	-30.1	0.006042	340
osa-miR5493	1:14342672|14344473	-37.4	0.002135	410
osa-miR5493	1:21414887|21415515	-30.9	0.009842	395
osa-miR5493	1:28018040|28020275	-36.3	0.005311	217
osa-miR5493	1:28019655|28020275	-36.3	0.000481	217
osa-miR5493	1:28019655|28020275	-32.7	0.003549	300
osa-miR5493	1:28019655|28020275	-31.5	0.006901	384
osa-miR5493	1:28019655|28020275	-31.3	0.007666	534
osa-miR5493	1:28019655|28020275	-31.3	0.007709	62
osa-miR5493	1:28019655|28020275	-31.1	0.008611	464
osa-miR5493	1:28019655|28020275	-31	0.0091	179
osa-miR5493	1:29160141|29161008	-34	0.003288	288
osa-miR5493	5:17019124|17019556	-32.8	0.001632	337
osa-miR5493	5:17019124|17019556	-32.2	0.002307	157
osa-miR5493	5:17019124|17019556	-31.6	0.003261	217
osa-miR5493	5:17019124|17019556	-30.7	0.005477	91
osa-miR5493	5:17019124|17019556	-30.4	0.00651	28
osa-miR5493	5:3783752|3784361	-40.1	5.6e-05	139
osa-miR5493	5:3783752|3784361	-37.3	0.000265	228
osa-miR5493	5:3783752|3784361	-37.1	0.000297	199
osa-miR5493	5:3783752|3784361	-36.5	0.000414	465
osa-miR5493	5:3783752|3784361	-36	0.000547	109
osa-miR5493	5:3783752|3784361	-34	0.001665	312
osa-miR5493	5:3783752|3784361	-32.6	0.003625	79
osa-miR5493	5:3783752|3784361	-31.9	0.005348	55
osa-miR5493	5:3783752|3784361	-31	0.00881	385
osa-miR5493	8:25889975|25893080	-39.2	0.002273	908
osa-miR5493	8:25889975|25893080	-39.1	0.002384	397
osa-miR5493	8:27737960|27738788	-32.4	0.007134	604
osa-miR5810	7:17619729|17620645	-33.8	0.005148	336
osa-miR5813	2:5280637|5281014	-31.1	0.00364	119
osa-miR5813	3:35756165|35756545	-35.3	0.00032	96
osa-miR5813	5:17019124|17019556	-30.2	0.007978	68
osa-miR812k	1:42601899|42609688	-40.4	0.006777	6065
osa-miR812p	1:42601899|42609688	-39.7	0.00917	6066
osa-miR818a	2:33162566|33168048	-39.1	0.006312	496
osa-miR820a	10:12892035|12892702	-32.2	0.005368	121
osa-miR820a	10:12892035|12892702	-31.1	0.009822	321
osa-miR820a	4:22184732|22185773	-32.8	0.008616	784
osa-miR820a	9:11180455|11181028	-31.2	0.007048	215
osa-miR820a	3:34767417|34768567	-34.7	0.003802	469
osa-miR820a	3:34767417|34769097	-34.7	0.007307	469
osa-miR820a	1:35389026|35390484	-34.1	0.007807	609
osa-miR820a	5:3783752|3784361	-30.9	0.009311	85
osa-miR820a	8:3282316|3283320	-33.7	0.005037	254
Novel.39	1:2779813|2788690	-40.7	0.006341	4214
Novel.43	2:32909761|32911543	-35.3	0.006454	951
Novel.43	7:29581983|29583217	-34.3	0.005744	190
Novel.58	2:4694023|4694319	-30.6	0.002704	19
Novel.58	8:25889975|25893080	-36.3	0.008978	1604
Novel.107	6:2698918|2700348	-33.6	0.009744	314
Novel.118	1:2779813|2788690	-41.9	0.003528	4214
